# Supplementary material
Source: ML conference proceedings conference paper supplement (https://proceedings.mlr.press/v37/wanga15.html)
Supplement: Supplementary file 1 [file wanga15-supp.pdf]

## A. Proof of Proposition 1

*Proof.* We only prove the proposition for  $\boldsymbol{\mu} = 0$ . If  $\boldsymbol{\mu} \neq 0$ , we could simply take the mapping  $\mathbf{x} \rightarrow \mathbf{x} - \boldsymbol{\mu}$ ,  $\mathbf{y} \rightarrow \mathbf{y} - \boldsymbol{\mu}$  and complete the proof in a similar manner.

When  $\mathbf{W}$  is full rank, it is well known that the projected vector  $\mathbf{y} \in S \subseteq \mathbb{R}^D$  has the following form:

$$\mathbf{y} = \mathbf{W}(\mathbf{W}^\top \mathbf{W})^{-1} \mathbf{W}^\top \mathbf{x} = (\mathbf{U}_d \mathbf{U}_d^\top) \mathbf{x}.$$

Next, note that

$$\mathbf{U}_d \mathbf{U}_d^\top = \mathbf{U} \text{diag}(\mathbf{I}_d, \mathbf{O}) \mathbf{U}^\top. \quad (32)$$

Therefore,

$$\begin{aligned} \|\mathbf{x} - \mathbf{y}\|^2 &= \|\mathbf{x} - (\mathbf{U}_d \mathbf{U}_d^\top) \mathbf{x}\|^2 \\ &= \|\mathbf{x} - \mathbf{U} \text{diag}(1, \dots, 1, 0, \dots, 0) \mathbf{U}^\top \mathbf{x}\|^2 \\ &= \|\mathbf{U}^\top \mathbf{x} - \text{diag}(1, \dots, 1, 0, \dots, 0) \mathbf{U}^\top \mathbf{x}\|^2 \\ &= \sum_{j=d+1}^D [\mathbf{U}^\top \mathbf{x}]_j^2. \end{aligned}$$

□

## B. Technical details of SVA analysis

### B.1. Derivation of the update rule for $z$

For creating a new cluster, we use Laplace approximation to approximate the integration. We first write the conditional distribution as

$$p(z_i = k_{new} | \mathbf{X}, \rho, a, b, r, \alpha) = \frac{\alpha}{Z} \sum_{d=1}^D p_0(d|r) \int p(\mathbf{x}_i | \mathbf{W}, \boldsymbol{\mu}, \sigma^2) d p_0(\mathbf{W}, \boldsymbol{\mu} | d, \rho, a, b) =: \frac{1}{Z} \sum_{d=1}^D p_0(d|r) J_d. \quad (33)$$

Subsequently, the scaled conditional distribution can be written as

$$p(z_i = k_{new} | \mathbf{X}, \rho, a, b, r, \alpha, \beta) = \frac{\alpha}{Z} \sum_{d=1}^D p_0(d|r, \beta') J_d(\beta), \quad (34)$$

where

$$J_d(\beta) = \int p(\mathbf{x}_i | \mathbf{W}, \boldsymbol{\mu}, \sigma^2, \beta) d p_0(\mathbf{W}, \boldsymbol{\mu} | d, \rho, a, b, \beta). \quad (35)$$

Define  $\boldsymbol{\theta}_d := (\mathbf{W}, \boldsymbol{\mu})$  with  $\mathbf{W} \in \mathbb{R}^{D \times d}$  and

$$f_{d,\beta}(\boldsymbol{\theta}_d) := \beta^{-1} \cdot p(\mathbf{x}_i | \mathbf{W}, \boldsymbol{\mu}, \sigma^2, \beta) p_0(\mathbf{W}, \boldsymbol{\mu} | d, a, b, \rho, \beta). \quad (36)$$

Using Laplace's approximation, we have (as  $\beta \rightarrow \infty$ )

$$J_d(\beta) = \int \exp(-\beta f_{d,\beta}(\boldsymbol{\theta}_d)) d \boldsymbol{\theta}_d = \frac{\exp(-\beta f_{d,\beta}(\hat{\boldsymbol{\theta}}_d))}{(2\pi/\beta)^{-D(d+1)/2}} \left( \left| \frac{\partial^2 f_{d,\beta}(\hat{\boldsymbol{\theta}}_d)}{\partial \boldsymbol{\theta} \partial \boldsymbol{\theta}^\top} \right|^{-1/2} + o(1) \right), \quad (37)$$

where  $\hat{\boldsymbol{\theta}}_d = \text{argmin}_{\boldsymbol{\theta}_d} f_{d,\beta}(\boldsymbol{\theta}_d)$ . Note that <sup>7</sup>

$$\lim_{\beta \rightarrow \infty} f_{d,\beta}(\boldsymbol{\theta}_d) = \exp \left( -\sigma^{-2} \cdot \sum_{j=d+1}^D [\mathbf{U}^\top (\mathbf{x}_i - \boldsymbol{\mu})]_j^2 \right) = \exp \left( -\frac{d(\mathbf{x}_i, S)^2}{\sigma^2} \right). \quad (38)$$

<sup>7</sup>Recall that  $\lim_{x \rightarrow \infty} f(x) = g(x)$  means  $\lim_{x \rightarrow \infty} \frac{f(x)}{g(x)} = 1$ .

As a result,  $f_{d,\beta}(\hat{\theta}_d) = 0$  (taking  $\boldsymbol{\mu} = \mathbf{x}_i$ ) and

$$\lim_{\beta \rightarrow \infty} J_d(\beta) = (2\pi/\beta)^{D(d+1)/2} \cdot g_d(\mathbf{x}_i), \quad (39)$$

where  $g_d(\mathbf{x}_i)$  only depends on  $d$  and  $\mathbf{x}_i$ . Therefore,

$$\lim_{\beta \rightarrow \infty} p(z_i = k_{new}) = \lim_{\beta \rightarrow \infty} \frac{\alpha}{Z} \sum_{d=0}^D \exp(-\beta' d + o(\beta)) = \frac{\alpha}{Z} \exp(o(\beta)). \quad (40)$$

## B.2. Derivation of the update rule for $W_k$

Define

$$K_{d_k}(\beta) := \int p(\mathbf{X}|\mathbf{W}, \boldsymbol{\mu}, \mathbf{z}, \sigma^2, \beta) p_0(\mathbf{W}|d_k, a, b, \beta) d\mathbf{W}. \quad (41)$$

Then the (scaled) posterior distribution of  $d_k$  can be written as

$$p(d_k|\mathbf{X}, \mathbf{z}, \boldsymbol{\mu}, a, b, r, \beta) = \frac{1}{Z(\mathbf{X})} p_0(d_k|r, \beta') K_{d_k}(\beta). \quad (42)$$

Next, define

$$F_{d_k,\beta}(\mathbf{W}) := \beta^{-1} p(\mathbf{X}|\mathbf{W}, \boldsymbol{\mu}, \mathbf{z}, \sigma^2, \beta) p_0(\mathbf{W}|d_k, a, b, \beta). \quad (43)$$

Using Laplace approximation, we have

$$K_{d_k}(\beta) = \int \exp(-\beta F_{d_k,\beta}(\mathbf{W})) d\mathbf{W} = \frac{\exp(-\beta F_{d_k,\beta}(\hat{\mathbf{W}}))}{(2\pi/\beta)^{-D d_k/2}} \left( \left| \frac{\partial^2 F_{d_k,\beta}(\hat{\mathbf{W}})}{\partial \mathbf{W} \partial \mathbf{W}^\top} \right|^{-1/2} + o(1) \right), \quad (44)$$

where  $\hat{\mathbf{W}}$  is the minimizer of  $F_{d_k,\beta}(\cdot)$ . Note that for any full-rank  $\mathbf{W} \in \mathbb{R}^{D \times d_k}$ ,

$$\lim_{\beta \rightarrow \infty} F_{d_k,\beta}(\mathbf{W}) = \exp \left( - \sum_{i=1}^n 1_{[z_i=k]} \sum_{j=d_k+1}^D \frac{[\mathbf{U}^\top(\mathbf{x}_i - \boldsymbol{\mu}_k)]_j^2}{\sigma^2} - \sum_{j=1}^{d_k} \frac{l_j^{-1}}{b} \right). \quad (45)$$

Taking  $l_j \rightarrow \infty$ , it is then clear that

$$\lim_{\beta \rightarrow \infty} F_{d_k,\beta}(\hat{\mathbf{W}}) = \exp \left( - \inf_{\mathbf{U}} \sum_{i=1}^n 1_{[z_i=k]} \sum_{j=d_k+1}^D \frac{[\mathbf{U}^\top(\mathbf{x}_i - \boldsymbol{\mu}_k)]_j^2}{\sigma^2} \right) \quad (46)$$

$$= \exp \left( - \inf_{\mathbf{W} \in \mathbb{R}^{D \times d_k}} \sum_{i=1}^n 1_{[z_i=k]} \cdot \frac{d(\mathbf{x}_i, S(\mathbf{W}, \boldsymbol{\mu}_k))^2}{\sigma^2} \right). \quad (47)$$

Here the second equation is due to the fact that  $d(\cdot, S(\mathbf{W}, \boldsymbol{\mu}))$  does not depend on eigenvalues of  $\mathbf{W}$ , and hence optimization over  $\mathbf{U}$  is equivalent to optimization over  $\mathbf{W}$ .

## B.3. Proof of Theorem 1

*Proof.* We first prove that for each cluster  $k \in [K]$ , after updating the subspace projection matrix  $\mathbf{W}_k$  (along with its dimension  $d_k$ ) and the offset  $\boldsymbol{\mu}_k$ , the loss function  $\mathcal{L}$  does not increase. When subspace dimension  $d_k = d$  is fixed, the update rule

$$\boldsymbol{\mu}_k = \frac{1}{n_k} \sum_{z_i=k} \mathbf{x}_i, \quad \mathbf{U}_{d_k}^{(k)} = \mathbf{A}_d \quad (48)$$

is exactly the same with principle component analysis (PCA) for the top  $d_k$  principle directions.. As a result, the subspace  $S_k$  given by  $S(\mathbf{W}_k, \boldsymbol{\mu}_k)$  minimizes the total squared distance of data points and  $S_k$  within the  $k$ -th cluster (i.e.,

$\sum_{z_i=k} d(\mathbf{x}_i, S_k)^2$ ). Note again that the distance  $d(\mathbf{x}_i, S(\mathbf{W}_k, \boldsymbol{\mu}_k))$  only depends on  $\boldsymbol{\mu}_k$  and the orthogonal matrix  $\mathbf{U}_d^{(k)}$  associated with  $\mathbf{W}_k$ . The eigenvalues of  $\mathbf{W}_k$  do not affect the distance.

We have proved that given  $d_k = d$ , the update rule given in Eq. (48) chooses  $\mathbf{W}_k$  and  $\boldsymbol{\mu}_k$  that minimizes the total squared distance for each instance. The update rule for  $d_k$  given in Eq. (27) shows that we want to select the dimension  $d$  that minimizes the sum of total squared distance and a linear penalty term  $s \cdot d$ . This is consistent with the deterministic loss function  $\mathcal{L}$  shown in Eq. (31). So after updates of  $\mathbf{W}$ ,  $d$  and  $\boldsymbol{\mu}$  the loss function does not increase.

Next, we turn to the update of cluster assignments  $z$ . We want to prove that after each update of  $z_i$  for some data point  $\mathbf{x}_i$  the loss function does not increase. This part of analysis resembles the analysis of K-means and DP-means algorithm (Kulis & Jordan, 2012). When we assign  $z_i$  to an existing cluster it is clear the distance  $d(\mathbf{x}_i, S_k)$  does not increase and neither does the total loss. When  $z_i$  is assigned to a new cluster, we lose a  $d(\mathbf{x}_i, S_k)$  cost and gains a  $\lambda$  cost because of creating a new cluster. This does not increase the total loss function  $\mathcal{L}$ , however, by the definition of  $Q_i(k)$  and the update rule of  $z_i$  shown in Eq. (23). Note that the new cluster will have a dimension of zero, so no extra penalty term is incurred.

□

## C. Details of Hopkins-155 experiments

### C.1. Some statistics of the Hopkins-155 dataset

Table 4 gives some statistics of the Hopkins-155 dataset, including the number of sequences ( $n$ ), the number of points ( $P$ ) and the number of frames ( $F$ ) per sequence. In Table 4 the notation *Check-2* refers to all checker board video sequences that contain 2 motions.

Table 4. Some statistics of the Hopkins 155 dataset (Tron & Vidal, 2007)

| Dataset    | $n$ | $P$  | $F$  |
|------------|-----|------|------|
| Check-2    | 78  | 291  | 28   |
| Check-3    | 26  | 437  | 28   |
| Traffic-2  | 31  | 241  | 30   |
| Traffic-3  | 7   | 332  | 31   |
| Articul.-1 | 11  | 155  | 40   |
| Articul.-2 | 2   | 122  | 31   |
| All        | 155 | vary | vary |

### C.2. Detailed performance comparison

In Table 5 we provide detailed performance comparison for the DP-space algorithm and its competitors, including both the mean and median classification error on each of the video sequence groups. Note that the results for EM-MPPCA-m are only included for reference because they are not directly comparable with other performance results.

Table 5. Classification error (%) of several algorithms on the Hopkins 155 dataset

|                 | Check-2     |             | Check-3     |             | Traffic-2   |             | Traffic-3   |             | Articul.-2  |             | Articul.-3  |             | All         |             |
|-----------------|-------------|-------------|-------------|-------------|-------------|-------------|-------------|-------------|-------------|-------------|-------------|-------------|-------------|-------------|
|                 | Mean        | Med.        |
| GPCA (5)        | 6.09        | 1.03        | 31.95       | 32.93       | 1.41        | <b>0.00</b> | 19.83       | 19.55       | 2.88        | <b>0.00</b> | 16.85       | 16.85       | 10.34       | 2.54        |
| GPCA (4N)       | 4.78        | 0.51        | 36.99       | 36.26       | 1.63        | <b>0.00</b> | 39.68       | 40.92       | 6.18        | 3.20        | 29.62       | 29.62       | 11.55       | 1.36        |
| RANSAC (5)      | 6.52        | 1.75        | 25.78       | 26.00       | 2.55        | 0.21        | 12.83       | 11.45       | 7.25        | 2.64        | 21.38       | 21.38       | 9.76        | 3.21        |
| ALC (5)         | 2.56        | <b>0.00</b> | 6.78        | 0.92        | 2.83        | 0.30        | <b>4.01</b> | 1.35        | 6.90        | 0.89        | 7.25        | 7.25        | 3.76        | <b>0.26</b> |
| ALC (SP)        | <b>1.49</b> | 0.27        | <b>5.00</b> | <b>0.66</b> | 1.75        | 1.51        | 8.86        | <b>0.51</b> | 10.70       | 0.95        | 21.08       | 21.08       | 3.37        | 0.49        |
| EM-MPPCA (5,a)  | 18.13       | 17.48       | 29.07       | 30.10       | 12.84       | 13.32       | 18.98       | 20.32       | 13.54       | 15.21       | 23.49       | 23.49       | 18.56       | 17.56       |
| EM-MPPCA (4N,a) | 24.85       | 24.75       | 37.01       | 38.07       | 18.46       | 18.15       | 29.03       | 26.04       | 12.90       | 14.11       | 32.11       | 32.11       | 24.88       | 23.44       |
| DP-space (5)    | 2.13        | 0.48        | 9.86        | 7.26        | <b>0.53</b> | 0.20        | 4.31        | 2.57        | 3.79        | 1.90        | <b>1.75</b> | <b>1.75</b> | <b>3.32</b> | 0.53        |
| DP-space (4N)   | 2.08        | 0.38        | 8.77        | 3.94        | <b>1.33</b> | 0.78        | 7.01        | 7.27        | <b>2.07</b> | 0.43        | 16.95       | 16.95       | <b>3.29</b> | 0.57        |
| EM-MPPCA (5,m)  | 2.95        | 0.00        | 10.76       | 10.37       | 0.52        | 0.00        | 1.96        | 0.99        | 0.46        | 0.00        | 9.33        | 9.33        | 3.49        | 0.00        |
| EM-MPPCA (4N,m) | 6.56        | 3.55        | 19.35       | 19.96       | 0.81        | 0.00        | 12.03       | 9.39        | 0.18        | 0.00        | 16.14       | 16.14       | 7.28        | 1.09        |
